# Supplementary material for: Modulated photophysics of an anthracene-based fluorophore within bile-salt aggregates: the effect of the ionic strength of the medium on the aggregation behavior
Source: Royal Society of Chemistry journal article supplement (doi:10.1039/c5pp00280j), 2015-09-25
Supplement: c5pp00280j1.pdf [file c5pp00280j1.pdf]

**Supplementary Information for**

**Modulated Photophysics of an Anthracene-based Fluorophore within Bile-salt**

**Aggregates: Effect of Ionic Strength of the Medium on the Aggregation Behavior**

Aniruddha Ganguly\*, Soumen Ghosh and Nikhil Guchhait\*

*Department of Chemistry, University of Calcutta, 92 A. P. C. Road, Calcutta-700009,*

*India*

\*To whom correspondence should be addressed. Tel.: +91-33-2350-8386. Fax: +91-33-

2351-9755. E-mail: [ani.physichem@gmail.com](mailto:ani.physichem@gmail.com) (A.G.), [nguchhait@yahoo.com](mailto:nguchhait@yahoo.com) (N.G.)

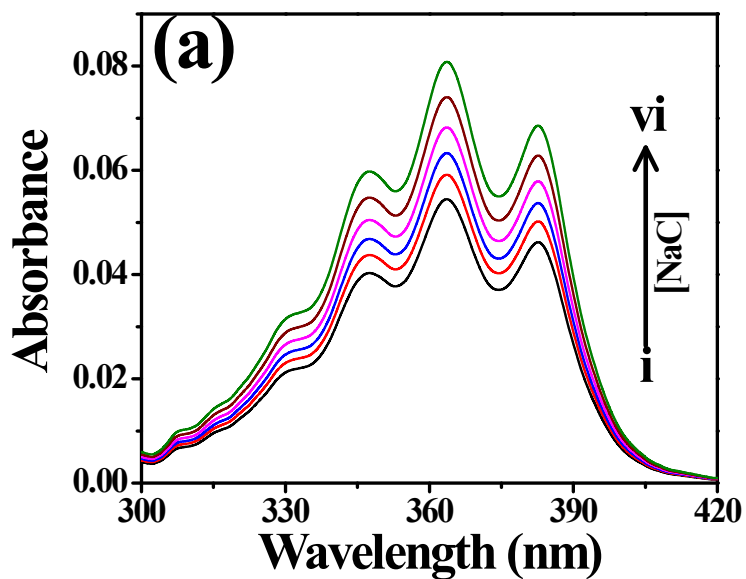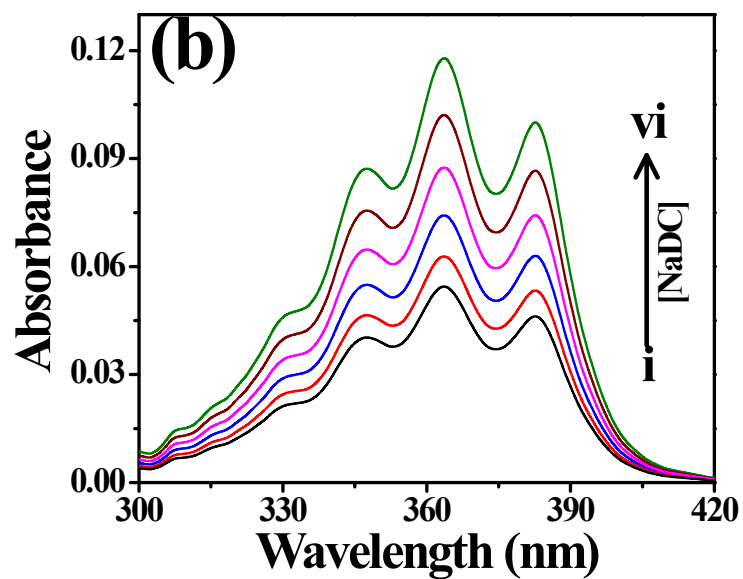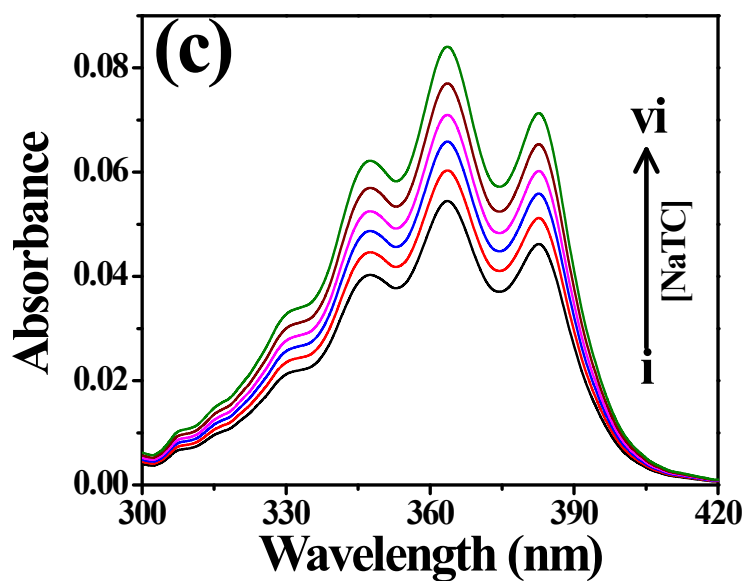

**Figure S1:** Absorption spectra of 9-MA in the presence of increasing concentration of (a) NaC (Curves i  $\rightarrow$  vi correspond to [NaC] = 0, 2, 5, 10, 15 and 20 mM respectively) (b) NaDC (Curves i  $\rightarrow$  vi correspond to [NaDC] = 0, 1, 2, 5, 8 and 10 mM respectively) and (c) NaTC (Curves i  $\rightarrow$  vi correspond to [NaTC] = 0, 2, 5, 10, 15 and 20 mM respectively) bile salts.

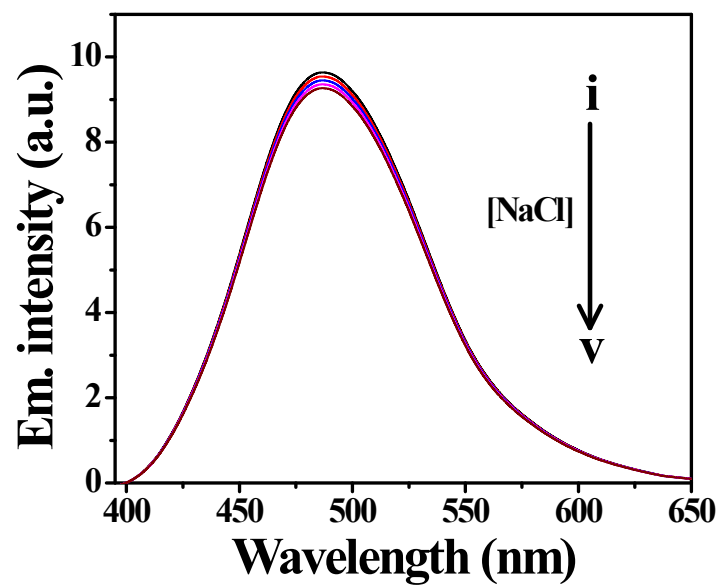

**Figure S2:** Effect of the addition of NaCl on the emission of 9-MA (curves i  $\rightarrow$  v correspond to  $[\text{NaCl}] = 0, 50, 100, 200, 500$  and  $750$  mM respectively).

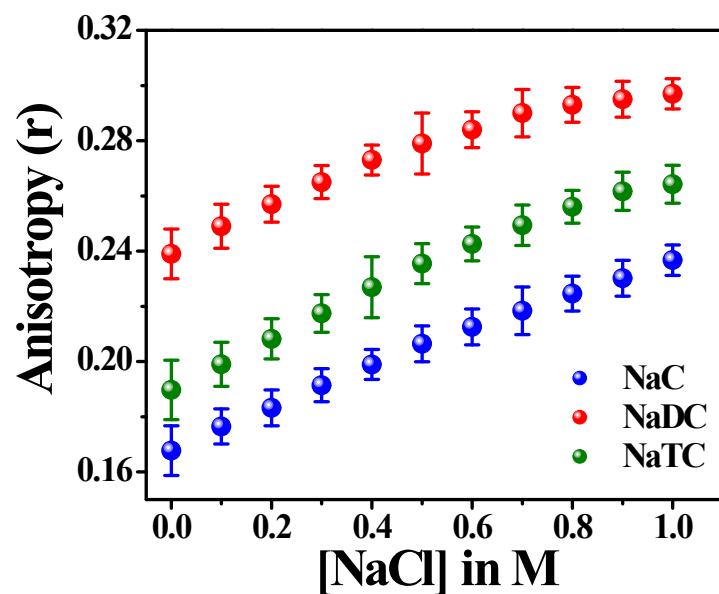

**Figure S3:** Variation of steady-state fluorescence anisotropy ( $r$ ) of the probe as a function of NaCl concentration in the presence of the bile salts. Each data point in the diagrams showing anisotropy variation is an average of 10 individual measurements. The error bars are within the marker symbols if not apparent.

**Table S1: Comparison of the second rotational relaxation components  $\tau_{2r}$  with the theoretical rotational relaxation times ( $\tau_L$ ) of the bile-salt aggregates as a whole (using the SED relation)**

| <b>Environment</b> | <b><math>\tau_{2r}</math></b> | <b><math>\tau_L</math></b> |
|--------------------|-------------------------------|----------------------------|
|                    | <b>(ns)</b>                   | <b>(ns)</b>                |
| NaC                | 1.52                          | 1.81                       |
| NaDC               | 4.95                          | 4.73                       |
| NaTC               | 1.67                          | 1.72                       |

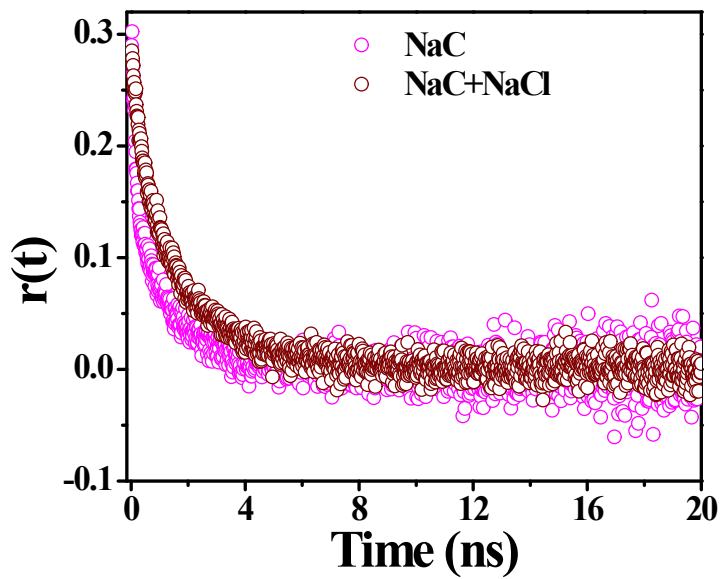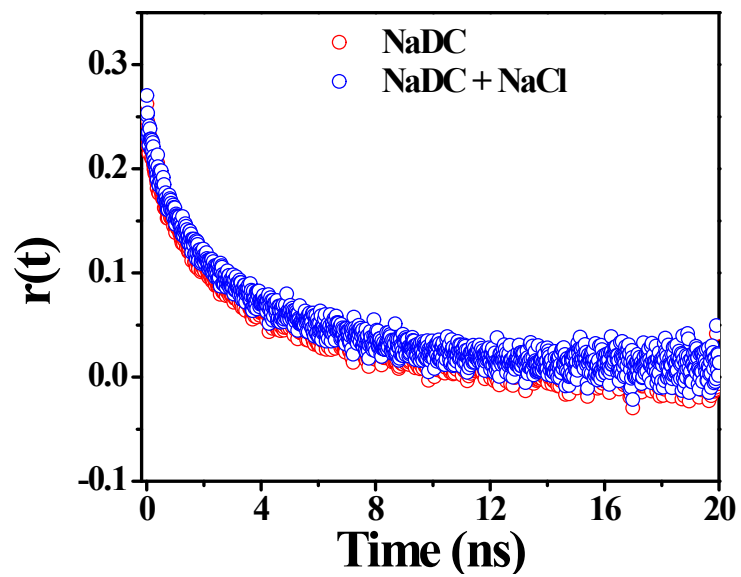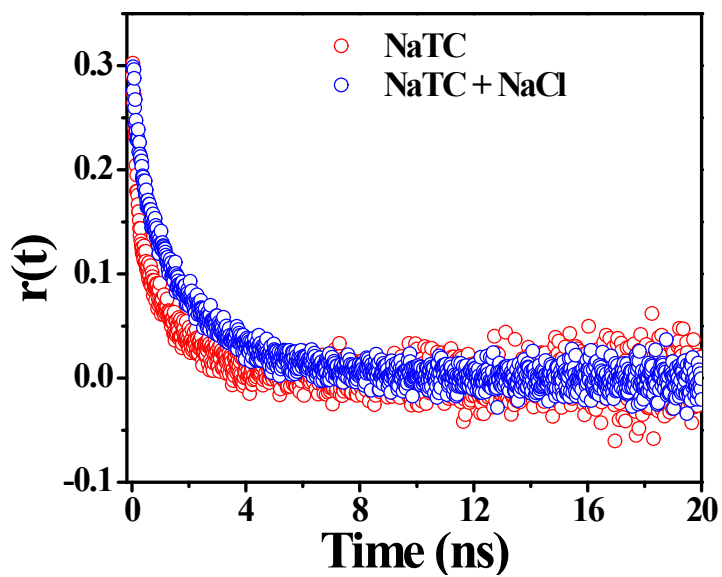

**Figure S4:** Fluorescence depolarization profile of the probe 9-MA in different bile salt aggregates (as mentioned in the figure legends) in the presence of NaCl.
